# Supplementary material for: A biphasic scaffold based on silk and bioactive ceramic with stratified properties for osteochondral tissue regeneration
Source: Royal Society of Chemistry journal article supplement (doi:10.1039/c5tb00353a), 2015-01-01
Supplement: c5tb00353a1.pdf [file c5tb00353a1.pdf]

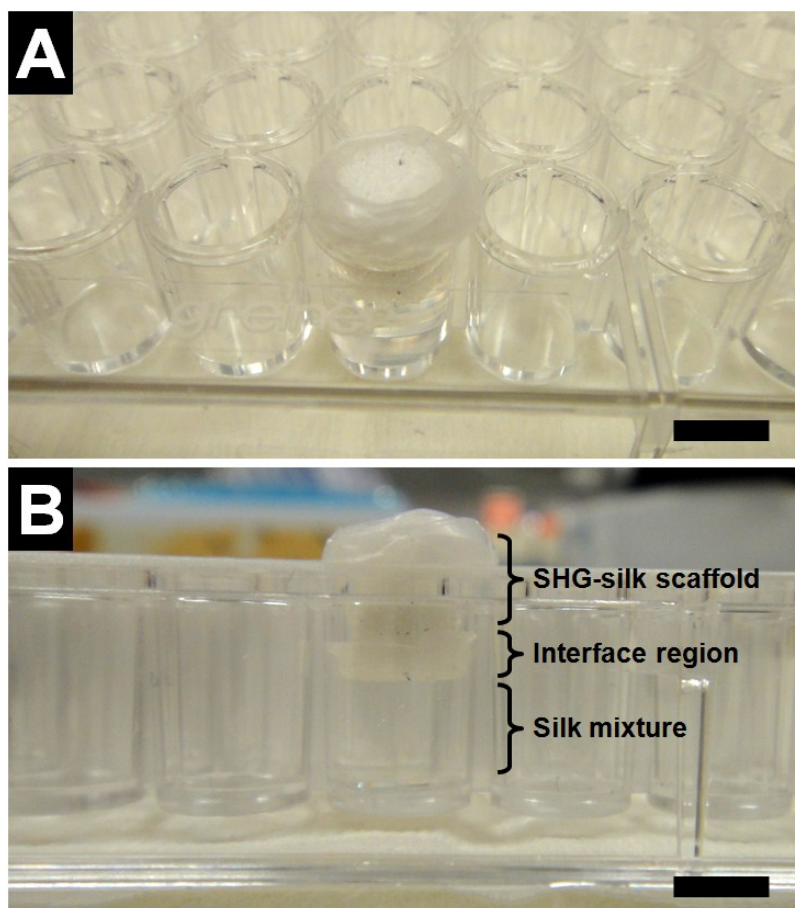

**Supplementary Fig. 1** The method of biphasic scaffold fabrication involved **(A)** wrapping the top half of the SHG-silk scaffold (bone phase) in paraffin film, and **(B)** mounting the SHG-silk scaffold inside the mixture of silk and methanol prior to silk scaffold (cartilage phase) formation. The paraffin film allowed the position of the SHG-silk scaffold to be adjusted and secured, thereby allowing control over its degree of immersion within the silk mixture and hence size of the interface region. A biphasic scaffold with two distinct and well-integrated phases was formed after freezing and thawing. Scale bar = 5mm.

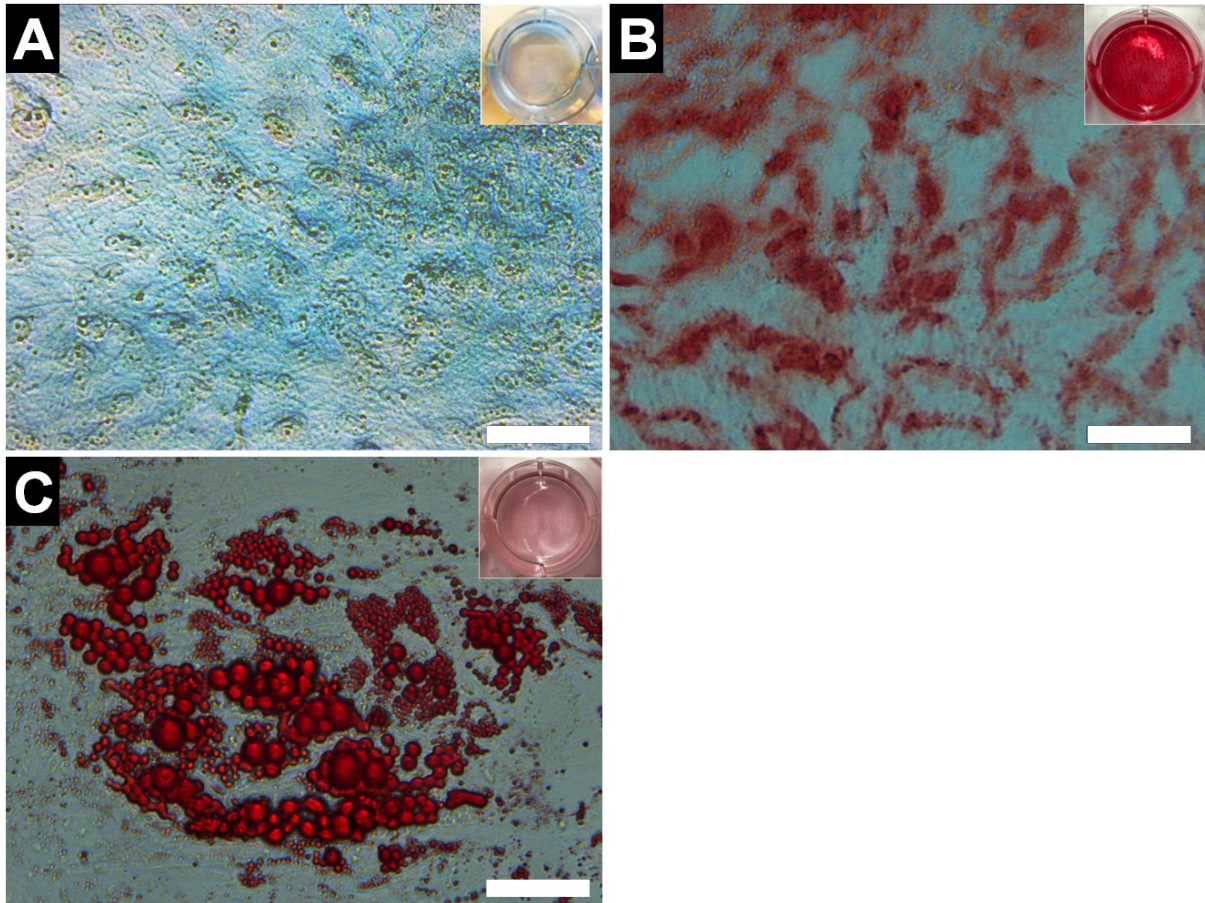

**Supplementary Fig. 2** The multipotency of hMSCs used for the *in vitro* experiments was tested by monolayer and micromass culture in inductive media, and confirmed by **(A)** chondrogenic differentiation at 21 days evidenced by the accumulation of sulfated glycosaminoglycans stained with Alcian blue, **(B)** osteogenic differentiation at 21 days evidenced by the accumulation of mineralised calcium phosphate stained with Alizarin red, and **(C)** adipogenic differentiation at 21 days evidenced by intracellular accumulation of lipid-rich vacuoles stained with Oil Red O. Scale bar = 50 $\mu$ m.
